# Supplementary material for: Serum metabolomics analysis of patients with chronic obstructive pulmonary disease and ‘frequent exacerbator’ phenotype
Source: PubMed Central journal article supplement — Mol Med Rep. 2024 Jun 13;30(2):137. doi: 10.3892/mmr.2024.13261 (PMC11200052; doi:10.3892/mmr.2024.13261), 2024-06-13

Figure S1. Extracted ion chromatograms of differential metabolites. (A) Arginine, (B) DG (16:0/20:4), (C) carnitine-C18:2, (D) DG (16:0/20:5), (E) D-fructose 1,6-bisphosphate and (F) L-2-hydroxyglutarate. DG, diacylglycerol.

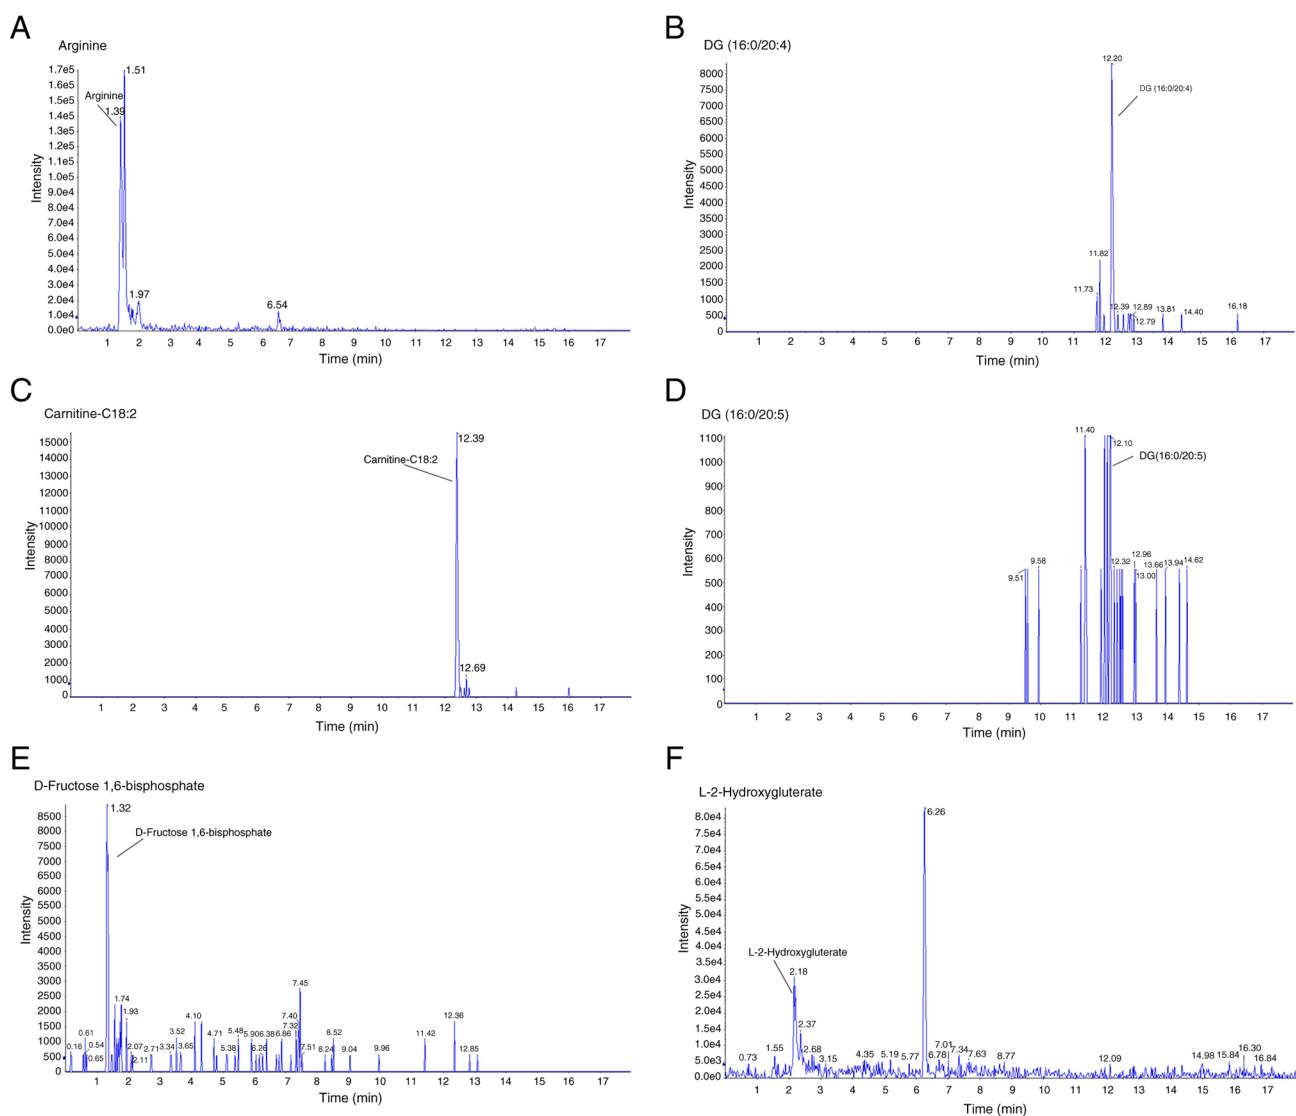

Supplement: Supplementary_Data1.pdf [file Supplementary_Data1.pdf]
