# Supplementary material for: Serum metabolomics analysis of patients with chronic obstructive pulmonary disease and ‘frequent exacerbator’ phenotype
Source: PubMed Central journal article supplement — Mol Med Rep. 2024 Jun 13;30(2):137. doi: 10.3892/mmr.2024.13261 (PMC11200052; doi:10.3892/mmr.2024.13261), 2024-06-13
Supplement: Supplementary_Data2.pdf [file Supplementary_Data2.pdf]

Table SI. m/z of identified metabolites.

| No. | MRM                        | m/z     |
|-----|----------------------------|---------|
| 1   | Urea_pos                   | 61.000  |
| 2   | Glycine_pos                | 76.000  |
| 3   | Trimethylamine N-oxide_pos | 76.100  |
| 4   | Cysteamine_pos             | 78.000  |
| 5   | Sarcosine_pos              | 90.000  |
| 6   | Alanine_pos                | 90.100  |
| 7   | Betaine aldehyde_pos       | 102.000 |
| 8   | Dimethylglycine_pos        | 104.070 |
| 9   | 3-Aminoisobutyric acid_pos | 104.100 |
| 10  | Serine_pos                 | 106.000 |
| 11  | Creatinine_pos             | 114.100 |
| 12  | Proline_pos                | 116.100 |
| 13  | Guanidinoacetic acid_pos   | 118.000 |
| 14  | Indole_pos                 | 118.000 |
| 15  | 5-Aminopentanoic acid_pos  | 118.090 |

|    |                                         |         |
|----|-----------------------------------------|---------|
| 16 | Betaine_pos                             | 118.100 |
| 17 | Valine_pos                              | 118.100 |
| 18 | Threonine_pos                           | 120.000 |
| 19 | L-Homoserine_pos                        | 120.070 |
| 20 | Purine_pos                              | 121.050 |
| 21 | Vitamin-B3(Nicotinamide)_pos            | 123.000 |
| 22 | Vitamin-B3(Nicotinic acid)_pos          | 124.000 |
| 23 | 5-Amino-4-carbamoylimidazole (AICA)_pos | 127.060 |
| 24 | L-Pipecolic acid_pos                    | 130.090 |
| 25 | 3-Methyl-2-oxovaleric acid_pos          | 131.000 |
| 26 | 5-Aminolevulinic acid_pos               | 132.070 |
| 27 | Creatine_pos                            | 132.080 |
| 28 | Leucine_pos                             | 132.110 |
| 29 | Isoleucine_pos                          | 132.120 |
| 30 | Ureidopropionic acid_pos                | 133.060 |
| 31 | Asparagine_pos                          | 133.100 |
| 32 | Ornithine_pos                           | 133.100 |

|    |                                             |         |
|----|---------------------------------------------|---------|
| 33 | Aspartate_pos                               | 134.000 |
| 34 | Methylcysteine_pos                          | 136.020 |
| 35 | Tyramine_pos                                | 138.200 |
| 36 | Urocanic acid_pos                           | 139.050 |
| 37 | O-Phosphoethanolamine_pos                   | 142.000 |
| 38 | Isobutyrylglycine_pos                       | 146.080 |
| 39 | 4-Guanidinobutyric acid_pos                 | 146.100 |
| 40 | Acetylcholine_pos                           | 147.000 |
| 41 | Glutamine_pos                               | 147.000 |
| 42 | Lysine_pos                                  | 147.100 |
| 43 | Na-Methyl-L-ornithine monohydrochloride_pos | 147.101 |
| 44 | Glutamate_pos                               | 148.100 |
| 45 | Methionine_pos                              | 150.100 |
| 46 | 2-Hydroxyadenine_pos                        | 152.060 |
| 47 | N1-Methyl-2-pyridone-5-carboxamide_pos      | 153.070 |
| 48 | 3-Hydroxyanthranilic acid_pos               | 154.100 |
| 49 | Histidine_pos                               | 156.100 |

|    |                              |         |
|----|------------------------------|---------|
| 50 | DL-2-Aminooctanoic acid_pos  | 160.140 |
| 51 | Carnitine-C0_pos             | 162.100 |
| 52 | 1,5-anhydroglucitol_pos      | 165.000 |
| 53 | 7-methylguanine_pos          | 166.000 |
| 54 | L-Methionine sulfoxide_pos   | 166.060 |
| 55 | Phenylalanine_pos            | 166.100 |
| 56 | Hordeine_pos                 | 166.130 |
| 57 | 1-Methylxanthine_pos         | 167.060 |
| 58 | 3-methoxytyramine (3-MT)_pos | 168.100 |
| 59 | 3-Methylhistidine_pos        | 170.200 |
| 60 | 1-Methylhistidine_pos        | 170.210 |
| 61 | N6-formyl_pos                | 175.100 |
| 62 | Serotonin_pos                | 177.100 |
| 63 | Glucosamine_pos              | 180.000 |
| 64 | Nicotinuric acid_pos         | 181.060 |
| 65 | Tyrosine_pos                 | 182.100 |
| 66 | N-Acetylglutamine_pos        | 189.090 |

|    |                                      |         |
|----|--------------------------------------|---------|
| 67 | Homoarginine_pos                     | 189.100 |
| 68 | N6-acetyl lysine_pos                 | 189.200 |
| 69 | 5-Methoxytryptamine_pos              | 191.120 |
| 70 | 5-Hydroxyindoleacetic acid_pos       | 192.300 |
| 71 | Dimethyl-L-arginine_pos              | 203.000 |
| 72 | NG,NG-Dimethyl-L-arginine (ADMA)_pos | 203.150 |
| 73 | Carnitine-C2_pos                     | 204.100 |
| 74 | CML_pos                              | 205.100 |
| 75 | Tryptophan_pos                       | 205.100 |
| 76 | GALA_pos                             | 205.200 |
| 77 | N-Acetyl-L-phenylalanine_pos         | 208.100 |
| 78 | L-Kynurenine_pos                     | 209.090 |
| 79 | N-alpha-Acetylarginine_pos           | 217.120 |
| 80 | CEL_pos                              | 219.100 |
| 81 | L-Abrine_pos                         | 219.120 |
| 82 | N6-lactoyl_pos                       | 219.200 |
| 83 | N6-oxalyl_pos                        | 219.400 |

|     |                               |         |
|-----|-------------------------------|---------|
| 84  | Carnitine-C4_pos              | 232.200 |
| 85  | Sepiapterin_pos               | 238.100 |
| 86  | Cystine_pos                   | 241.300 |
| 87  | Carnitine-C5:1_pos            | 244.200 |
| 88  | Tiglylcarnitine_pos           | 244.300 |
| 89  | Vitamin-B7(Biotin)_pos        | 245.100 |
| 90  | Carnitine-C5_pos              | 246.200 |
| 91  | Isovalerylcarnitine_pos       | 246.300 |
| 92  | CEA_pos                       | 247.100 |
| 93  | gamma-L-Glutamyl-L-valine_pos | 247.130 |
| 94  | Carnitine-C3DC_pos            | 248.100 |
| 95  | Carnitine-C4OH_pos            | 248.101 |
| 96  | Glycerophosphocholine_pos     | 258.120 |
| 97  | 3-Methyluridine_pos           | 259.100 |
| 98  | Hexanoylcarnitine_pos         | 260.170 |
| 99  | Carnitine-C6_pos              | 260.200 |
| 100 | Carnitine-C4DC_pos            | 262.100 |

|     |                                      |         |
|-----|--------------------------------------|---------|
| 101 | Carnitine-C5OH_pos                   | 262.200 |
| 102 | Vitamin-B1(Thiamine)_pos             | 265.000 |
| 103 | N6-threonyl_pos                      | 265.200 |
| 104 | Adenosine_pos                        | 268.110 |
| 105 | Inosine_pos                          | 269.090 |
| 106 | 3-Hydroxyhexanoylcarnitine_pos       | 276.170 |
| 107 | Saccharopine_pos                     | 277.000 |
| 108 | gamma-Glutamyl-L-methionine_pos      | 279.100 |
| 109 | N4-Acetylcytidine_pos                | 286.110 |
| 110 | Carnitine-C8:1_pos                   | 286.200 |
| 111 | Carnitine-C8_pos                     | 288.200 |
| 112 | gamma-L-Glutamyl-L-phenylalanine_pos | 295.130 |
| 113 | 5'-Methylthioadenosine_pos           | 298.100 |
| 114 | 7-methylguanosine_pos                | 298.120 |
| 115 | N2,N2-Dimethylguanosine_pos          | 312.130 |
| 116 | Carnitine-C10:2_pos                  | 312.200 |
| 117 | Carnitine-C10:1_pos                  | 314.100 |

|     |                                         |         |
|-----|-----------------------------------------|---------|
| 118 | Carnitine-C10_pos                       | 316.100 |
| 119 | UMP (Uridine 5'-monophosphate)_pos      | 325.100 |
| 120 | N-oleoylethanolamine_pos                | 326.300 |
| 121 | cAMP_pos                                | 330.100 |
| 122 | 17-OH-Progesterone_pos                  | 331.200 |
| 123 | Deoxyadenosine monophosphate (dAMP)_pos | 332.080 |
| 124 | Carnitine-C10 OH_pos                    | 332.200 |
| 125 | GOLA_pos                                | 333.200 |
| 126 | Carnitine-C12:1_pos                     | 342.300 |
| 127 | Carnitine-C12_pos                       | 344.300 |
| 128 | Corticosterone_pos                      | 347.000 |
| 129 | Cortexolone_pos                         | 347.500 |
| 130 | Cortisol_pos                            | 363.200 |
| 131 | Carnitine-C14:2_pos                     | 368.300 |
| 132 | 3, 5-Tetradecadiencarnitine_pos         | 368.500 |
| 133 | Carnitine-C14:1_pos                     | 370.300 |
| 134 | Carnitine-C14_pos                       | 372.300 |

|     |                              |         |
|-----|------------------------------|---------|
| 135 | Vitamin-B2(Riboflavin)_pos   | 377.000 |
| 136 | S-Lactoylglutathione_pos     | 380.110 |
| 137 | Carnitine-C14OH_pos          | 388.300 |
| 138 | Carnitine-C16:1_pos          | 398.300 |
| 139 | 1,25-Dihydroxyvitamin D3_pos | 399.300 |
| 140 | Carnitine-C16_pos            | 400.300 |
| 141 | Carnitine-C18:2_pos          | 424.300 |
| 142 | Carnitine-C18:1_pos          | 426.400 |
| 143 | Carnitine-C18_pos            | 428.400 |
| 144 | Lanosterin_pos               | 444.000 |
| 145 | DG(16:0/18:3)_pos            | 591.500 |
| 146 | DG(16:1/18:2)_pos            | 591.500 |
| 147 | DG(16:0/20:5)_pos            | 615.400 |
| 148 | DG(16:0/20:4)_pos            | 617.500 |
| 149 | DG(18:1/18:1)_pos            | 621.400 |
| 150 | DG(16:0/22:6)_pos            | 641.500 |
| 151 | DhCer d18:0/24:0_pos         | 652.900 |

|     |                     |         |
|-----|---------------------|---------|
| 152 | Methylcobalamin_pos | 673.000 |
| 153 | SM 30:1;4_pos       | 679.500 |
| 154 | SM 32:2;3_pos       | 689.600 |
| 155 | SM 32:1;4_pos       | 707.600 |
| 156 | SM 34:1;3_pos       | 719.500 |
| 157 | SM 34:0;3_pos       | 721.600 |
| 158 | SM 36:0;2_pos       | 733.600 |
| 159 | SM 34:1;4_pos       | 735.600 |
| 160 | SM 36:3;3_pos       | 743.500 |
| 161 | SM 36:2;3_pos       | 745.700 |
| 162 | SM 38:1;2_pos       | 759.600 |
| 163 | SM 38:0;2_pos       | 761.600 |
| 164 | SM 38:2;3_pos       | 773.600 |
| 165 | L-Thyroxine(T4)_pos | 777.700 |
| 166 | SM 40:1;2_pos       | 787.700 |
| 167 | SM 40:0;2_pos       | 789.600 |
| 168 | SM 40:4;3_pos       | 797.600 |

|     |                                    |         |
|-----|------------------------------------|---------|
| 169 | SM 40:3;3_pos                      | 799.700 |
| 170 | SM 40:2;3_pos                      | 801.700 |
| 171 | SM 42:3;2_pos                      | 811.600 |
| 172 | SM 42:2;2_pos                      | 813.700 |
| 173 | SM 42:1;2_pos                      | 815.700 |
| 174 | BMP(18:1/22:6)_pos                 | 838.600 |
| 175 | SM 44:1;2_pos                      | 843.700 |
| 176 | SM 44:0;3_pos                      | 861.600 |
| 177 | TG54:8-FA22:6_pos                  | 875.800 |
| 178 | TG58:8-FA22:5_pos                  | 931.800 |
| 179 | Lactamide_pos                      | 90.055  |
| 180 | N,N-Dimethylaniline_pos            | 122.096 |
| 181 | 2-Acetylpyrazine_pos               | 123.055 |
| 182 | 2-Methylindole_pos                 | 132.081 |
| 183 | Thiazolidine-4-carboxylic acid_pos | 134.027 |
| 184 | 2-Phenylacetamide_pos              | 136.076 |
| 185 | 3-FORMYLINDOLE_pos                 | 146.060 |

|     |                             |         |
|-----|-----------------------------|---------|
| 186 | DEOXYCARNITINE_pos          | 146.120 |
| 187 | Oxypurinol_pos              | 153.041 |
| 188 | N-Acetylhistamine_pos       | 154.097 |
| 189 | Indole-3-acetaldehyde_pos   | 160.076 |
| 190 | N-Methylglutamic acid_pos   | 162.076 |
| 191 | Diphenylamine_pos           | 170.096 |
| 192 | Caffeine_pos                | 195.088 |
| 193 | Ala-Leu_pos                 | 203.139 |
| 194 | Serylleucine_pos            | 219.135 |
| 195 | 4-Hydroxybenzoylcholine_pos | 224.128 |
| 196 | Leucylleucine_pos           | 245.187 |
| 197 | gamma-Glutamylleucine_pos   | 261.145 |
| 198 | gamma-Glutamylglutamine_pos | 276.119 |
| 199 | Phenylalanylisoleucine_pos  | 279.172 |
| 200 | Asp-Phe_pos                 | 281.113 |
| 201 | Oleamide_pos                | 282.279 |
| 202 | Hexaethylene glycol_pos     | 283.175 |

|     |                               |         |
|-----|-------------------------------|---------|
| 203 | gamma-Glutamyltyrosine_pos    | 311.124 |
| 204 | Phytosphingosine_pos          | 318.299 |
| 205 | N-Fructosyl phenylalanine_pos | 328.139 |
| 206 | Bilirubin_pos                 | 585.271 |
| 207 | Urobilinogen_pos              | 593.334 |
| 208 | Acetic acid_neg               | 59.000  |
| 209 | Malondialdehyde_neg           | 71.000  |
| 210 | Propionic acid_neg            | 73.000  |
| 211 | Pyruvate_neg                  | 87.000  |
| 212 | L-Lactate_neg                 | 89.000  |
| 213 | Acetoacetic acid_neg          | 101.000 |
| 214 | 2-Ketobutyric acid_neg        | 101.000 |
| 215 | Malonic acid_neg              | 103.000 |
| 216 | 2-Hydroxybutanoic acid_neg    | 103.100 |
| 217 | 3-Hydroxybutanoic acid_neg    | 103.100 |
| 218 | Glyceric acid_neg             | 105.020 |
| 219 | p-Cresol_neg                  | 107.000 |

|     |                                    |         |
|-----|------------------------------------|---------|
| 220 | Fumarate_neg                       | 115.000 |
| 221 | Alpha-ketoisovaleric acid_neg      | 115.050 |
| 222 | 2-Hydroxy-3-methylbutyric acid_neg | 117.000 |
| 223 | Succinic acid_neg                  | 117.090 |
| 224 | L-Threonine_neg                    | 118.000 |
| 225 | 3-Methylthiopropionic acid_neg     | 119.020 |
| 226 | Benzoic acid_neg                   | 121.020 |
| 227 | Taurine_neg                        | 124.000 |
| 228 | Pyroglutamic acid_neg              | 128.000 |
| 229 | 2-Ketohexanoic acid_neg            | 129.005 |
| 230 | Ketoleucine_neg                    | 129.060 |
| 231 | N-Acetyl-L-alanine_neg             | 130.050 |
| 232 | Methylsuccinic Acid_neg            | 131.000 |
| 233 | Oxaloacetic acid_neg               | 131.010 |
| 234 | Hydroxyisocaproic acid_neg         | 131.070 |
| 235 | L-Malate_neg                       | 133.000 |
| 236 | Hypoxanthine_neg                   | 135.000 |

|     |                                |         |
|-----|--------------------------------|---------|
| 237 | p-Aminobenzoic acid_neg        | 136.050 |
| 238 | 2-Hydroxybenzoic acid_neg      | 137.000 |
| 239 | p-Hydroxybenzoic acid_neg      | 137.020 |
| 240 | a-Ketoglutarate_neg            | 145.000 |
| 241 | Oxoglutaric acid_neg           | 145.020 |
| 242 | Adipic acid_neg                | 145.100 |
| 243 | N-acetylserine_neg             | 146.050 |
| 244 | Citramalic acid_neg            | 147.001 |
| 245 | L-2-Hydroxygluterate_neg       | 147.030 |
| 246 | Mevalonic acid_neg             | 147.070 |
| 247 | 3-methylphenylacetic acid_neg  | 149.002 |
| 248 | 4-Ethyl-2-methoxyphenol_neg    | 151.000 |
| 249 | p-Hydroxyphenylacetic acid_neg | 151.040 |
| 250 | Xanthine_neg                   | 151.110 |
| 251 | 2-Pyrocatechuic acid_neg       | 153.000 |
| 252 | 2,3-Dihydroxybenzoic acid_neg  | 153.020 |
| 253 | Tiglylglycine_neg              | 156.000 |

|     |                                  |         |
|-----|----------------------------------|---------|
| 254 | 4,5-Dihydroorotic acid_neg       | 157.000 |
| 255 | Allantoin_neg                    | 157.000 |
| 256 | L-Dihydroorotic acid_neg         | 157.020 |
| 257 | Isovalerylglycine_neg            | 158.000 |
| 258 | Aminoadipic acid_neg             | 160.000 |
| 259 | Indole-3-carboxylic acid_neg     | 160.100 |
| 260 | Phenyllactic acid_neg            | 165.050 |
| 261 | Phosphoenolpyruvate_neg          | 167.000 |
| 262 | Uric acid_neg                    | 167.020 |
| 263 | Dihydroxyacetone phosphate_neg   | 169.000 |
| 264 | D-Glyceraldehyde 3-phosphate_neg | 169.000 |
| 265 | Glycerol 3-phosphate_neg         | 171.000 |
| 266 | Aconitate_neg                    | 173.000 |
| 267 | Suberic Acid_neg                 | 173.000 |
| 268 | Shikimic acid_neg                | 173.150 |
| 269 | Arginine_neg                     | 173.200 |
| 270 | N-Acetyl-L-aspartic acid_neg     | 174.000 |

|     |                                 |         |
|-----|---------------------------------|---------|
| 271 | Citrulline_neg                  | 174.000 |
| 272 | Allantoic acid_neg              | 175.000 |
| 273 | 2-Isopropylmalic acid_neg       | 175.002 |
| 274 | N-Carbamoyl-L-aspartic acid_neg | 175.030 |
| 275 | Ureidosuccinic acid_neg         | 175.110 |
| 276 | L-Ascorbic acid_neg             | 175.120 |
| 277 | N-Formylmethionine_neg          | 176.040 |
| 278 | Pyrophosphate_neg               | 176.800 |
| 279 | Gluconolactone_neg              | 177.000 |
| 280 | Hippuric acid_neg               | 178.200 |
| 281 | Hexose Pool_neg                 | 179.000 |
| 282 | Fructose_neg                    | 179.010 |
| 283 | Inositol_neg                    | 179.020 |
| 284 | Glucose_neg                     | 179.020 |
| 285 | Mannose_neg                     | 179.030 |
| 286 | 4-Hydroxyphenylpyruvic acid_neg | 179.157 |
| 287 | Myoinositol_neg                 | 179.160 |

|     |                                |         |
|-----|--------------------------------|---------|
| 288 | 4-Hydroxyphenyllactic acid_neg | 181.040 |
| 289 | Homovanillic acid (HVA)_neg    | 181.200 |
| 290 | 4-Pyridoxic acid_neg           | 182.003 |
| 291 | Azelaic acid_neg               | 187.100 |
| 292 | Kynurenic acid_neg             | 188.000 |
| 293 | N-Acetylglutamic acid_neg      | 188.100 |
| 294 | Isocitrate_neg                 | 191.000 |
| 295 | Citrate_neg                    | 191.000 |
| 296 | D-Glucuronic acid_neg          | 193.030 |
| 297 | p-Aminohippuric acid_neg       | 193.100 |
| 298 | Salicyluric acid_neg           | 194.100 |
| 299 | Gluconic acid_neg              | 195.000 |
| 300 | Vanillomandelic acid (VMA)_neg | 197.000 |
| 301 | FA(12:0)_neg                   | 199.100 |
| 302 | Sebacic acid_neg               | 201.100 |
| 303 | Cinnamoylglycine_neg           | 204.000 |
| 304 | Xanthurenic acid_neg           | 204.001 |

|     |                                |         |
|-----|--------------------------------|---------|
| 305 | 2-Methylcitric acid_neg        | 205.000 |
| 306 | Indoxyl sulfate_neg            | 212.000 |
| 307 | Deoxyribose phosphate_neg      | 213.000 |
| 308 | Gamma-glutamyl-Alanine_neg     | 217.000 |
| 309 | Pantothenic acid_neg           | 218.000 |
| 310 | 5-Hydroxy-L-tryptophan_neg     | 219.000 |
| 311 | FA(14:0)_neg                   | 227.100 |
| 312 | Alpha-D-Ribose 5-phosphate_neg | 229.000 |
| 313 | Thymidine_neg                  | 241.089 |
| 314 | Pseudouridine_neg              | 243.060 |
| 315 | Uridine_neg                    | 243.060 |
| 316 | Pyridoxal 5-phosphate_neg      | 246.040 |
| 317 | FA(16:2)_neg                   | 251.100 |
| 318 | Shikimate-3-phosphate_neg      | 253.100 |
| 319 | FA(16:1)_neg                   | 253.100 |
| 320 | FA(16:0)_neg                   | 255.100 |
| 321 | Gamma-glutamyl-Isoleucine_neg  | 258.000 |

|     |                                     |         |
|-----|-------------------------------------|---------|
| 322 | Gamma-glutamyl-Leucine_neg          | 258.100 |
| 323 | Hexose Monophosphate Pool_neg       | 259.020 |
| 324 | D-Glucose 1-phosphate_neg           | 259.020 |
| 325 | D-Fructose 6-phosphate_neg          | 259.030 |
| 326 | Phenylacetylglutamine_neg           | 263.100 |
| 327 | 2,3-Diphosphoglyceric acid_neg      | 265.100 |
| 328 | Estradiol_neg                       | 271.100 |
| 329 | FA(18:3)_neg                        | 277.200 |
| 330 | FA(18:2)_neg                        | 279.200 |
| 331 | FA(18:1)_neg                        | 281.200 |
| 332 | Guanosine_neg                       | 281.940 |
| 333 | Xanthosine_neg                      | 282.700 |
| 334 | FA(18:0)_neg                        | 283.200 |
| 335 | Sedoheptulose monophosphate_neg     | 289.040 |
| 336 | Argininosuccinic acid_neg           | 289.270 |
| 337 | 13S-hydroxyoctadecadienoic acid_neg | 295.300 |
| 338 | Eicosapentaenoic acid_neg           | 301.200 |

|     |                                            |         |
|-----|--------------------------------------------|---------|
| 339 | FA(20:4)_neg                               | 303.200 |
| 340 | FA(20:3)_neg                               | 305.200 |
| 341 | FA(20:2)_neg                               | 307.200 |
| 342 | FA(20:1)_neg                               | 309.200 |
| 343 | FA(20:0)_neg                               | 311.200 |
| 344 | Octulose-monophosphate_neg                 | 319.000 |
| 345 | 8-HETE_neg                                 | 319.000 |
| 346 | 11,12-Epoxyeicosatrienoic acid_neg         | 319.000 |
| 347 | 12-HETE_neg                                | 319.000 |
| 348 | 14,15-Epoxy-5,8,11-eicosatrienoic acid_neg | 319.000 |
| 349 | 20-Hydroxyeicosatetraenoic acid_neg        | 319.000 |
| 350 | 11-HETE_neg                                | 319.200 |
| 351 | 15-HETE_neg                                | 319.460 |
| 352 | Uridine 5-monophosphate_neg                | 323.100 |
| 353 | FA(22:6)_neg                               | 327.200 |
| 354 | Cyclic adenosine monophosphate_neg         | 328.000 |
| 355 | FA(22:3)_neg                               | 333.300 |

|     |                                 |         |
|-----|---------------------------------|---------|
| 356 | LTB4_neg                        | 335.000 |
| 357 | FA(22:2)_neg                    | 335.300 |
| 358 | 11,12-DiHETrE_neg               | 337.000 |
| 359 | 14,15-DHET_neg                  | 337.000 |
| 360 | FA(22:1)_neg                    | 337.300 |
| 361 | D-Fructose 1,6-bisphosphate_neg | 338.990 |
| 362 | Hexose Diphosphate Pool_neg     | 339.000 |
| 363 | FA(22:0)_neg                    | 339.300 |
| 364 | Sucrose_neg                     | 341.110 |
| 365 | LXA4_neg                        | 351.000 |
| 366 | Prostaglandin D2_neg            | 351.000 |
| 367 | 13,14-Dihydro-15-keto PGF2a_neg | 353.000 |
| 368 | PGF2alpha_neg                   | 353.000 |
| 369 | Cortisone_neg                   | 359.200 |
| 370 | FA(24:4)_neg                    | 359.300 |
| 371 | FA(24:2)_neg                    | 363.300 |
| 372 | Orotidine monophosphate_neg     | 367.000 |

|     |                               |         |
|-----|-------------------------------|---------|
| 373 | FA(24:0)_neg                  | 367.300 |
| 374 | Thromboxane B2_neg            | 369.300 |
| 375 | Lithocholic acid_neg          | 375.300 |
| 376 | Alloisolithocholic acid_neg   | 375.300 |
| 377 | 23-Nordeoxycholic acid_neg    | 377.300 |
| 378 | Sphingosine 1-phosphate_neg   | 378.200 |
| 379 | S-Adenosylhomocysteine_neg    | 383.117 |
| 380 | Deoxycytidine diphosphate_neg | 386.000 |
| 381 | 6-Ketolithocholic acid_neg    | 389.300 |
| 382 | 12-Ketolithocholic acid_neg   | 389.300 |
| 383 | 7-Ketolithocholic acid_neg    | 389.300 |
| 384 | Apocholic acid_neg            | 389.300 |
| 385 | Chenodeoxycholic acid_neg     | 391.300 |
| 386 | Isodeoxycholic acid_neg       | 391.300 |
| 387 | Deoxycholic acid_neg          | 391.600 |
| 388 | Dioxolithocholic acid_neg     | 403.300 |
| 389 | Allocholic acid_neg           | 407.300 |

|     |                                                                    |         |
|-----|--------------------------------------------------------------------|---------|
| 390 | beta-Muricholic acid_neg                                           | 407.300 |
| 391 | alpha-Muricholic acid_neg                                          | 407.300 |
| 392 | Hyochoholic acid_neg                                               | 407.300 |
| 393 | Cholic acid_neg                                                    | 407.600 |
| 394 | Glyco-ursocholanic Acid_neg                                        | 416.317 |
| 395 | Thiamine pyrophosphate_neg                                         | 423.100 |
| 396 | 3a,6a,7a,12a-Tetrahydroxy-5b-cholanoic acid(2a,3a,7a,12a-THBA)_neg | 423.300 |
| 397 | ADP_neg                                                            | 426.000 |
| 398 | Folic acid_neg                                                     | 440.100 |
| 399 | Chenodeoxyglycocholic acid_neg                                     | 448.300 |
| 400 | Glycochenodeoxycholic acid(GCDCA)_neg                              | 448.300 |
| 401 | Glycodeoxycholic acid(GDCA)_neg                                    | 448.300 |
| 402 | LPE(16:1)_neg                                                      | 450.263 |
| 403 | Lithocholic acid (LCA-S) sulfate_neg                               | 455.247 |
| 404 | 3a,12a, 23-Nordeoxycholic Acid sulfate_neg                         | 457.227 |
| 405 | Adenylsuccinic acid_neg                                            | 462.100 |

|     |                                                    |         |
|-----|----------------------------------------------------|---------|
| 406 | Glycocholic acid(GCA)_neg                          | 464.300 |
| 407 | Deoxycytidine triphosphate_neg                     | 465.800 |
| 408 | 9(11), (5p)-Cholenic Acid-3a-ol-12-one sulfate_neg | 467.211 |
| 409 | 3a-Hydroxy-12 Ketolithocholic Acid sulfate_neg     | 469.227 |
| 410 | Chenodeoxycholic Acid sulfate_neg                  | 471.242 |
| 411 | LPE(18:3)_neg                                      | 474.263 |
| 412 | LPE(18:2)_neg                                      | 476.278 |
| 413 | LPE(18:1)_neg                                      | 478.293 |
| 414 | LPE(18:0)_neg                                      | 480.310 |
| 415 | Cholic acid sulfate_neg                            | 487.237 |
| 416 | 2-Deoxyinosine triphosphate_neg                    | 490.900 |
| 417 | Taurochenodeoxycholic Acid_neg                     | 498.300 |
| 418 | LPE(20:3)_neg                                      | 502.294 |
| 419 | LPG(18:2)_neg                                      | 507.273 |
| 420 | Glycolithocholic Acid sulfate_neg                  | 512.269 |
| 421 | Tauro alpha/beta/omega muricholic acid_neg         | 514.300 |
| 422 | Taurohyocholic acid_neg                            | 514.300 |

|     |                                        |         |
|-----|----------------------------------------|---------|
| 423 | Taurocholic acid_neg                   | 514.300 |
| 424 | LPE(22:6)_neg                          | 524.278 |
| 425 | LPE(22:5)_neg                          | 526.294 |
| 426 | Glycodeoxycholic acid sulfate_neg      | 528.200 |
| 427 | Glycochenodeoxycholic Acid sulfate_neg | 528.264 |
| 428 | LPE(22:4)_neg                          | 528.310 |
| 429 | Taurolithocholic acid -3-O-sulfate_neg | 562.200 |
| 430 | Glycocholic Acid sulfate_neg           | 566.240 |
| 431 | Dihydroxy bile acid glucuronide_neg    | 567.300 |
| 432 | LPC(22:5)_neg                          | 568.362 |
| 433 | LPI(16:0)_neg                          | 571.289 |
| 434 | LPI(18:3)_neg                          | 593.273 |
| 435 | Taurocholic acid-3-O-sulfate_neg       | 594.200 |
| 436 | LPI(18:2)_neg                          | 595.289 |
| 437 | LPI(18:0)_neg                          | 599.320 |
| 438 | PA(16:0/16:1)_neg                      | 645.400 |
| 439 | PA(16:0/16:0)_neg                      | 647.486 |

|     |                             |         |
|-----|-----------------------------|---------|
| 440 | PA(16:0/18:1)_neg           | 673.501 |
| 441 | PE(P-18:1/18:2)_neg         | 724.500 |
| 442 | CL(18:2/18:2/18:2/18:1)_neg | 724.600 |
| 443 | PG(16:0/18:2)_neg           | 745.503 |
| 444 | PG(16:0/18:1)_neg           | 747.518 |
| 445 | PG(18:1/18:2)_neg           | 771.518 |
| 446 | PG(18:0/18:2)_neg           | 773.534 |
| 447 | PG(18:1/18:1)_neg           | 773.534 |
| 448 | PC(18:1/18:1)_neg           | 784.607 |
| 449 | PG(20:0/18:1)_neg           | 803.581 |
| 450 | PI(14:0/18:2)_neg           | 805.487 |
| 451 | PI(14:0/18:1)_neg           | 807.503 |
| 452 | PI(18:2/16:1)_neg           | 831.503 |
| 453 | PI(18:2/22:6)_neg           | 905.518 |
| 454 | 3-Hydroxybenzaldehyde_neg   | 121.030 |
| 455 | Threonic acid_neg           | 135.030 |
| 456 | Salicylic acid_neg          | 137.024 |

|     |                                |         |
|-----|--------------------------------|---------|
| 457 | 4-Nitrophenol_neg              | 138.020 |
| 458 | 4-Hydroxyquinoline_neg         | 144.045 |
| 459 | Indole-3-carboxaldehyde_neg    | 144.045 |
| 460 | Cinnamic acid_neg              | 147.045 |
| 461 | P-Toluenesulfonic acid_neg     | 171.012 |
| 462 | CAFFEIC ACID_neg               | 179.035 |
| 463 | 2,4-Dinitrophenol_neg          | 183.005 |
| 464 | 3-Indolepropionic acid_neg     | 188.072 |
| 465 | Indolelactic acid_neg          | 204.067 |
| 466 | 2-Naphthalenesulfonic acid_neg | 207.012 |
| 467 | FA(13:0)_neg                   | 213.186 |
| 468 | Monoisobutyl phthalate_neg     | 221.082 |
| 469 | Pyroglutamyl-Isoleucine_neg    | 241.119 |
| 470 | FA(15:0)_neg                   | 241.217 |
| 471 | Isoleucylisoleucinev_neg       | 243.172 |
| 472 | beta-Hydroxymyristic acid_neg  | 243.197 |
| 473 | N-Acetyltryptophan_neg         | 245.093 |

|     |                                 |         |
|-----|---------------------------------|---------|
| 474 | FA(17:0)_neg                    | 269.249 |
| 475 | N-Acetylneuraminic acid_neg     | 308.099 |
| 476 | Octadecanedioic acid_neg        | 313.238 |
| 477 | Dodecylbenzenesulfonic acid_neg | 325.184 |
| 478 | Avocadyne Acetate_neg           | 325.238 |
| 479 | FA(22:4)_neg                    | 331.264 |
| 480 | Abietic acid_neg                | 301.217 |
| 481 | FA(5:0)_neg                     | 101.130 |
| 482 | FA(6:0)_neg                     | 115.160 |
| 483 | FA(8:0)_neg                     | 143.210 |
| 484 | FA(10:0)_neg                    | 171.260 |

MRM, multiple reaction monitoring.

Table SII. Top 25 metabolic pathway quantitative enrichment results from metabolite set enrichment analysis.

| Description                                 | Total cmpd | Hits | Statistic Q | P-value | FDR    |
|---------------------------------------------|------------|------|-------------|---------|--------|
| Sphingolipid Metabolism                     | 40         | 5    | 24.6900     | 0.0026  | 0.2435 |
| Steroid Biosynthesis                        | 48         | 4    | 16.0410     | 0.0273  | 0.6438 |
| Warburg Effect                              | 58         | 23   | 12.9790     | 0.0451  | 0.6438 |
| Transfer of Acetyl Groups into Mitochondria | 22         | 8    | 13.4390     | 0.0456  | 0.6438 |
| Citric Acid Cycle                           | 32         | 12   | 13.0030     | 0.0466  | 0.6438 |
| Folate Metabolism                           | 29         | 4    | 12.6590     | 0.0524  | 0.6438 |
| Gluconeogenesis                             | 35         | 14   | 11.3300     | 0.0562  | 0.6438 |
| Pyruvate Metabolism                         | 48         | 11   | 10.8980     | 0.0602  | 0.6438 |
| Lactose Degradation                         | 9          | 2    | 11.3550     | 0.0677  | 0.6438 |
| Lactose Synthesis                           | 20         | 4    | 11.3420     | 0.0678  | 0.6438 |
| Glutathione Metabolism                      | 21         | 6    | 7.5311      | 0.0888  | 0.7665 |
| Histidine Metabolism                        | 43         | 9    | 7.7237      | 0.1023  | 0.7672 |
| Porphyrin Metabolism                        | 40         | 4    | 6.8452      | 0.1492  | 0.7672 |
| Valine, Leucine and Isoleucine Degradation  | 60         | 14   | 6.4807      | 0.1545  | 0.7672 |

|                                  |    |    |        |        |        |
|----------------------------------|----|----|--------|--------|--------|
| Glycolysis                       | 25 | 10 | 5.7858 | 0.1725 | 0.7672 |
| Pterine Biosynthesis             | 29 | 2  | 6.0160 | 0.1767 | 0.7672 |
| Phospholipid Biosynthesis        | 29 | 4  | 5.6532 | 0.1907 | 0.7672 |
| Galactose Metabolism             | 38 | 8  | 4.9660 | 0.2365 | 0.7672 |
| Starch and Sucrose Metabolism    | 31 | 7  | 4.9645 | 0.2366 | 0.7672 |
| Fructose and mannose degradation | 32 | 8  | 4.9643 | 0.2366 | 0.7672 |
| Amino Sugar Metabolism           | 33 | 11 | 4.9558 | 0.2368 | 0.7672 |
| Plasmalogen Synthesis            | 26 | 1  | 4.8505 | 0.2422 | 0.7672 |
| Bile acid biosynthesis           | 65 | 13 | 4.4303 | 0.2523 | 0.7672 |
| Caffeine metabolism              | 24 | 2  | 4.6330 | 0.2533 | 0.7672 |
| Tryptophan metabolism            | 60 | 15 | 4.3966 | 0.2625 | 0.7672 |

cmp, compound; FDR, false discovery rate.

Table SIII. Top 25 enriched metabolic pathways identified by Metabolite Pathway Analysis.

| Description                                 | Total compd | Hits | P-value | FDR    |
|---------------------------------------------|-------------|------|---------|--------|
| Sphingolipid metabolism                     | 21          | 4    | 0.0099  | 0.4678 |
| Terpenoid backbone biosynthesis             | 18          | 1    | 0.0272  | 0.4678 |
| Glyoxylate and dicarboxylate metabolism     | 32          | 11   | 0.0456  | 0.4678 |
| Citrate cycle (TCA cycle)                   | 20          | 11   | 0.0466  | 0.4678 |
| Alanine, aspartate and glutamate metabolism | 28          | 15   | 0.0469  | 0.4678 |
| Glycolysis / Gluconeogenesis                | 26          | 12   | 0.0564  | 0.4678 |
| Pyruvate metabolism                         | 22          | 9    | 0.0605  | 0.4678 |
| Riboflavin metabolism                       | 4           | 1    | 0.0655  | 0.4678 |
| One carbon pool by folate                   | 9           | 1    | 0.0658  | 0.4678 |
| Fatty acid degradation                      | 39          | 1    | 0.0959  | 0.5413 |
| Porphyrin and chlorophyll metabolism        | 30          | 4    | 0.0975  | 0.5413 |
| Histidine metabolism                        | 16          | 5    | 0.1015  | 0.5413 |
| Valine, leucine and isoleucine biosynthesis | 8           | 8    | 0.1518  | 0.6825 |
| Valine, leucine and isoleucine degradation  | 40          | 8    | 0.1519  | 0.6825 |
| Aminoacyl-tRNA biosynthesis                 | 48          | 18   | 0.1600  | 0.6825 |

|                                             |    |   |        |        |
|---------------------------------------------|----|---|--------|--------|
| Folate biosynthesis                         | 27 | 2 | 0.1767 | 0.7068 |
| Primary bile acid biosynthesis              | 46 | 8 | 0.2363 | 0.7468 |
| Amino sugar and nucleotide sugar metabolism | 37 | 4 | 0.2366 | 0.7468 |
| Caffeine metabolism                         | 10 | 2 | 0.2533 | 0.7468 |
| Tryptophan metabolism                       | 41 | 7 | 0.2645 | 0.7468 |
| Synthesis and degradation of ketone bodies  | 5  | 2 | 0.3020 | 0.7468 |
| Butanoate metabolism                        | 15 | 5 | 0.3054 | 0.7468 |
| beta-Alanine metabolism                     | 21 | 3 | 0.3062 | 0.7468 |
| Ether lipid metabolism                      | 20 | 1 | 0.3259 | 0.7468 |
| Vitamin B6 metabolism                       | 9  | 2 | 0.3285 | 0.7468 |

cmp, compound; FDR, false discovery rate.

Table SIV. Top 30 significantly enriched pathways associated with differential metabolites identified by KEGG analysis.

| Description                             | Metabolite ratio | P-value | q-value | KEGG ID                     | Rich factor | Up | Down |
|-----------------------------------------|------------------|---------|---------|-----------------------------|-------------|----|------|
| Central carbon metabolism in cancer     | 3/13             | 0.0002  | 0.0017  | C00062/C00311/C00158        | 26.76       | 2  | 1    |
| Fc gamma R-mediated phagocytosis        | 2/13             | 0.0002  | 0.0017  | C06124/C00165               | 82.5        | 2  | 0    |
| Apelin signaling pathway                | 2/13             | 0.0003  | 0.0017  | C06124/C00165               | 73.33       | 2  | 0    |
| Biosynthesis of amino acids             | 4/13             | 0.0004  | 0.0017  | C05378/C00062/C00311/C00158 | 10.31       | 2  | 2    |
| Neuroactive ligand-receptor interaction | 3/13             | 0.0004  | 0.0017  | C06124/C01829/C00780        | 19.04       | 2  | 1    |
| Calcium signaling pathway               | 2/13             | 0.0005  | 0.0017  | C06124/C00165               | 60          | 2  | 0    |
| Phospholipase D signaling pathway       | 2/13             | 0.0005  | 0.0017  | C06124/C00165               | 60          | 2  | 0    |
| Gap junction                            | 2/13             | 0.0005  | 0.0017  | C00165/C00780               | 60          | 1  | 1    |
| Thyroid hormone signaling pathway       | 2/13             | 0.0005  | 0.0017  | C00165/C01829               | 60          | 2  | 0    |
| Amoebiasis                              | 2/13             | 0.0006  | 0.0021  | C00062/C00165               | 50.77       | 1  | 1    |
| Sphingolipid signaling pathway          | 2/13             | 0.0009  | 0.0026  | C06124/C00165               | 44          | 2  | 0    |
| Citrate cycle (TCA cycle)               | 2/13             | 0.0016  | 0.0042  | C00311/C00158               | 33          | 2  | 0    |
| Thyroid hormone synthesis               | 2/13             | 0.0017  | 0.0043  | C00165/C01829               | 31.43       | 2  | 0    |
| cAMP signaling pathway                  | 2/13             | 0.0024  | 0.0057  | C00165/C00780               | 26.4        | 1  | 1    |

|                                                   |      |        |        |                      |       |   |   |
|---------------------------------------------------|------|--------|--------|----------------------|-------|---|---|
| Glucagon signaling pathway                        | 2/13 | 0.0026 | 0.0058 | C00311/C00158        | 25.38 | 2 | 0 |
| Taste transduction                                | 2/13 | 0.0040 | 0.0077 | C00158/C00780        | 20.62 | 1 | 1 |
| Pathways of neurodegeneration - multiple diseases | 2/13 | 0.0040 | 0.0077 | C00062/C00165        | 20.62 | 1 | 1 |
| Carbon metabolism                                 | 3/13 | 0.0043 | 0.0078 | C05378/C00311/C00158 | 8.68  | 2 | 1 |
| Inflammatory mediator regulation of TRP channels  | 2/13 | 0.0048 | 0.0082 | C00165/C00780        | 18.86 | 1 | 1 |
| EGFR tyrosine kinase inhibitor resistance         | 1/13 | 0.0061 | 0.0099 | C00165               | 165   | 1 | 0 |
| Serotonergic synapse                              | 2/13 | 0.0068 | 0.0106 | C00165/C00780        | 15.71 | 1 | 1 |
| NF-kappa B signaling pathway                      | 1/13 | 0.0091 | 0.0119 | C00165               | 110   | 1 | 0 |
| Th1 and Th2 cell differentiation                  | 1/13 | 0.0091 | 0.0119 | C00165               | 110   | 1 | 0 |
| Autoimmune thyroid disease                        | 1/13 | 0.0091 | 0.0119 | C01829               | 110   | 1 | 0 |
| ErbB signaling pathway                            | 1/13 | 0.0121 | 0.0119 | C00165               | 82.5  | 1 | 0 |
| mTOR signaling pathway                            | 1/13 | 0.0121 | 0.0119 | C00062               | 82.5  | 0 | 1 |
| Natural killer cell mediated cytotoxicity         | 1/13 | 0.0121 | 0.0119 | C00165               | 82.5  | 1 | 0 |
| Th17 cell differentiation                         | 1/13 | 0.0121 | 0.0119 | C00165               | 82.5  | 1 | 0 |
| T cell receptor signaling pathway                 | 1/13 | 0.0121 | 0.0119 | C00165               | 82.5  | 1 | 0 |
| B cell receptor signaling pathway                 | 1/13 | 0.0121 | 0.0119 | C00165               | 82.5  | 1 | 0 |

KEGG, Kyoto Encyclopedia of Genes and Genomes.

Table SV. Spearman's correlation analysis between differential metabolites and clinical indicators.

| Metabolite                      | Age   | BMI   | CAT                | mMRC               | EOS                | NLR                | PLR                | FEV1%<br>pred | PF                  | BP                  | GH                  | MH    | RE    | RP                  | SF                  | VT                  | HT    |
|---------------------------------|-------|-------|--------------------|--------------------|--------------------|--------------------|--------------------|---------------|---------------------|---------------------|---------------------|-------|-------|---------------------|---------------------|---------------------|-------|
| Sphingosine 1-phosphate         | 0.03  | -0.03 | 0.39 <sup>ab</sup> | 0.64 <sup>ab</sup> | -0.02              | 0.21               | 0.28               | -0.28         | -0.68 <sup>ac</sup> | 0.04                | -0.35               | 0.16  | -0.19 | -0.35               | -0.11               | -0.11               | -0.22 |
| Pyroglutamyl-Isoleucine         | 0.12  | 0.27  | 0.55 <sup>ab</sup> | 0.43 <sup>ab</sup> | -0.29              | 0.18               | 0.05               | -0.09         | -0.49 <sup>ac</sup> | -0.08               | 0.06                | -0.05 | -0.26 | -0.46 <sup>ac</sup> | -0.43 <sup>ac</sup> | -0.46 <sup>ac</sup> | -0.06 |
| L-2-Hydroxyglutarate            | 0.09  | 0.17  | 0.57 <sup>ab</sup> | 0.51 <sup>ab</sup> | 0.03               | 0.10               | -0.01              | -0.12         | -0.45 <sup>ac</sup> | -0.38 <sup>ac</sup> | -0.11               | 0.21  | -0.06 | -0.33               | -0.34               | -0.29               | -0.24 |
| 13S-hydroxyoctadecadienoic acid | 0.22  | -0.08 | 0.39 <sup>ab</sup> | 0.44 <sup>ab</sup> | 0.07               | 0.03               | 0.01               | -0.20         | -0.54 <sup>ac</sup> | -0.24               | 0.02                | -0.04 | -0.35 | -0.38 <sup>ac</sup> | -0.42 <sup>ac</sup> | -0.30               | -0.23 |
| Hexanoylcarnitine               | -0.06 | 0.17  | 0.48 <sup>ab</sup> | 0.27               | 0.17               | 0.07               | -0.09              | 0.05          | -0.40 <sup>ac</sup> | -0.13               | -0.24               | 0.02  | -0.15 | -0.18               | -0.26               | -0.19               | -0.12 |
| Carnitine-C6                    | -0.03 | 0.14  | 0.45 <sup>ab</sup> | 0.20               | 0.19               | -0.03              | -0.19              | 0.11          | -0.35               | -0.18               | -0.20               | 0.01  | -0.21 | -0.13               | -0.25               | -0.18               | -0.13 |
| Carnitine-C18:2                 | 0.07  | 0.01  | 0.34               | 0.24               | -0.02              | 0.23               | 0.10               | -0.21         | -0.49 <sup>ac</sup> | -0.24               | -0.28               | 0.15  | -0.04 | -0.26               | -0.18               | -0.07               | -0.14 |
| Carnitine-C18:1                 | 0.01  | -0.12 | 0.32               | 0.15               | 0.01               | 0.20               | 0.02               | -0.10         | -0.34               | -0.34               | -0.28               | 0.02  | -0.07 | -0.08               | -0.29               | -0.05               | -0.14 |
| DG (16:0/20:5)                  | -0.12 | 0.04  | 0.53 <sup>ab</sup> | 0.43 <sup>ab</sup> | -0.15              | 0.46 <sup>ab</sup> | 0.22               | -0.07         | -0.48 <sup>ac</sup> | -0.07               | -0.38 <sup>ac</sup> | 0.03  | 0.11  | -0.36               | -0.29               | -0.30               | -0.28 |
| DG (16:0/20:4)                  | 0.06  | 0.06  | 0.29               | 0.20               | -0.03              | 0.14               | 0.01               | -0.25         | -0.37 <sup>ac</sup> | -0.13               | -0.17               | 0.12  | -0.17 | -0.23               | -0.20               | -0.17               | -0.18 |
| Cinnamic acid                   | 0.23  | -0.05 | 0.25               | 0.18               | -0.13              | 0.17               | 0.27               | -0.04         | -0.26               | -0.50 <sup>ac</sup> | -0.11               | 0.13  | -0.07 | -0.25               | -0.15               | -0.17               | -0.17 |
| 3-(Methylthio)propionic acid    | -0.30 | 0.23  | 0.25               | 0.26               | 0.42 <sup>ab</sup> | -0.18              | -0.12              | -0.01         | -0.42 <sup>ac</sup> | -0.05               | -0.03               | 0.09  | 0.06  | -0.16               | -0.08               | 0.00                | 0.00  |
| L-Thyroxine                     | 0.05  | 0.03  | 0.22               | 0.22               | -0.07              | 0.45 <sup>ab</sup> | 0.45 <sup>ab</sup> | -0.22         | -0.29               | -0.05               | -0.35               | -0.09 | -0.14 | -0.15               | -0.22               | -0.07               | -0.01 |
| Citrate                         | 0.16  | -0.19 | 0.33               | 0.13               | 0.16               | -0.10              | 0.18               | -0.01         | -0.18               | -0.42 <sup>ac</sup> | -0.09               | 0.25  | 0.09  | -0.11               | -0.31               | -0.24               | -0.05 |
| Citramalic acid                 | 0.10  | 0.07  | 0.29               | 0.31               | 0.05               | 0.05               | -0.03              | -0.11         | -0.39 <sup>ac</sup> | -0.30               | 0.06                | 0.18  | -0.11 | -0.29               | -0.11               | -0.11               | -0.24 |

|                                |       |                    |                     |                     |                    |                     |       |       |                    |                    |                    |       |       |                    |                    |                     |                    |
|--------------------------------|-------|--------------------|---------------------|---------------------|--------------------|---------------------|-------|-------|--------------------|--------------------|--------------------|-------|-------|--------------------|--------------------|---------------------|--------------------|
| Isocitrate                     | 0.31  | -0.02              | 0.29                | 0.31                | 0.02               | 0.04                | 0.10  | -0.22 | -0.36              | -0.21              | 0.06               | 0.27  | -0.13 | -0.16              | -0.21              | -0.01               | -0.01              |
| 2-Hydroxy-3-methylbutyric acid | -0.21 | 0.42 <sup>ab</sup> | 0.29                | 0.03                | 0.26               | -0.15               | -0.22 | 0.23  | -0.10              | -0.10              | -0.05              | 0.12  | 0.04  | -0.01              | 0.02               | 0.00                | -0.03              |
| LPG (18:2)                     | 0.19  | 0.12               | 0.23                | 0.18                | -0.19              | 0.11                | -0.01 | 0.01  | -0.27              | -0.14              | 0.03               | -0.15 | -0.04 | -0.25              | -0.31              | -0.42 <sup>ac</sup> | -0.16              |
| FA (24:0)                      | -0.02 | -0.16              | 0.13                | -0.08               | 0.13               | -0.05               | -0.16 | 0.16  | -0.05              | -0.21              | -0.17              | 0.13  | 0.03  | 0.19               | -0.10              | 0.01                | -0.09              |
| Mevalonic acid                 | -0.17 | 0.15               | -0.48 <sup>ac</sup> | -0.31               | 0.38 <sup>ab</sup> | -0.41 <sup>a</sup>  | -0.16 | -0.04 | 0.26               | 0.15               | 0.38 <sup>ab</sup> | 0.17  | 0.20  | 0.25               | 0.12               | 0.41 <sup>ab</sup>  | 0.18               |
| D-Fructose 1,6-bisphosphate    | -0.11 | -0.23              | -0.45 <sup>ac</sup> | -0.40 <sup>ac</sup> | 0.14               | -0.44 <sup>ac</sup> | -0.17 | 0.17  | 0.51 <sup>ab</sup> | 0.09               | 0.28               | 0.05  | 0.14  | 0.39 <sup>ab</sup> | 0.20               | 0.47 <sup>ab</sup>  | 0.29               |
| Threonate                      | 0.15  | 0.25               | -0.08               | -0.15               | -0.17              | 0.08                | 0.00  | 0.05  | 0.24               | 0.08               | 0.06               | -0.23 | -0.12 | 0.28               | 0.13               | -0.04               | 0.53 <sup>ab</sup> |
| Arginine                       | 0.10  | -0.25              | -0.34               | -0.13               | 0.03               | 0.01                | 0.18  | -0.26 | 0.27               | 0.42 <sup>ab</sup> | 0.21               | 0.18  | 0.15  | 0.28               | 0.37 <sup>ab</sup> | 0.52 <sup>ab</sup>  | 0.30               |
| Inosine                        | -0.21 | 0.05               | -0.17               | -0.31               | 0.31               | -0.18               | -0.10 | 0.22  | 0.34               | 0.22               | 0.14               | 0.05  | 0.22  | 0.15               | 0.21               | 0.21                | -0.08              |
| Serotonin                      | 0.14  | 0.00               | -0.09               | -0.05               | -0.23              | -0.18               | 0.07  | 0.19  | 0.26               | 0.13               | 0.20               | 0.11  | 0.22  | 0.30               | 0.18               | 0.09                | 0.12               |

Values in the table represent the rs values from Spearman's correlation analysis. <sup>a</sup>P<0.05, <sup>b</sup>positive correlation, and <sup>c</sup>negative correlation. FA, fatty acid; DG, diacylglycerol; BMI, body mass index; CAT, chronic obstructive pulmonary disease assessment test; mMRC, modified Medical Research Council; EOS, eosinophil; NLR, neutrophil-to-lymphocyte ratio; PLR, platelet-to-lymphocyte ratio; FEV1% pred, forced expiratory volume in 1 sec; PF, physical functioning; BP, bodily pain; GH, general health; MH, mental health; RE, role emotional; SF, social functioning; VT, vitality; HT, health transition.

Table SVI. Receiver operating characteristics analysis of differential metabolites.

| Metabolite                      | AUC    | P-value | FC      |
|---------------------------------|--------|---------|---------|
| D-Fructose 1,6-bisphosphate     | 0.8711 | 0.0002  | 0.2559  |
| L-2-Hydroxygluterate            | 0.8489 | 0.0010  | -0.4133 |
| Arginine                        | 0.8356 | 0.0007  | 0.4276  |
| DG (16:0/20:5)                  | 0.8267 | 0.0043  | -1.2148 |
| DG (16:0/20:4)                  | 0.8178 | 0.0063  | -1.0147 |
| Carnitine-C18:2                 | 0.8044 | 0.0026  | -0.6261 |
| Cinnamic acid                   | 0.8000 | 0.0119  | -0.3093 |
| FA (24:0)                       | 0.7911 | 0.0175  | -1.5099 |
| Sphingosine 1-phosphate         | 0.7822 | 0.0032  | -0.3288 |
| Threonate                       | 0.7822 | 0.0070  | 0.7370  |
| Citramalic acid                 | 0.7733 | 0.0120  | -0.3224 |
| 2-Hydroxy-3-methylbutyric acid  | 0.7733 | 0.0179  | -0.6460 |
| Pyroglutamyl-Isoleucine         | 0.7511 | 0.0234  | -0.3811 |
| Carnitine-C18:1                 | 0.7422 | 0.0238  | -0.5692 |
| 13S-hydroxyoctadecadienoic acid | 0.7333 | 0.0295  | -0.5713 |

|                              |        |        |         |
|------------------------------|--------|--------|---------|
| Isocitrate                   | 0.7244 | 0.0322 | -0.3527 |
| Inosine                      | 0.7067 | 0.0230 | 0.9277  |
| Citrate                      | 0.7022 | 0.0459 | -0.2754 |
| LPG (18:2)                   | 0.6978 | 0.0381 | -0.2149 |
| L-Thyroxine                  | 0.6978 | 0.0434 | -0.4030 |
| 3-(Methylthio)propionic acid | 0.6933 | 0.0436 | -0.4454 |
| Serotonin                    | 0.6933 | 0.0326 | 0.5813  |
| Mevalonic acid               | 0.6844 | 0.0272 | 0.4201  |
| Hexanoylcarnitine            | 0.6844 | 0.0477 | -0.7658 |
| Carnitine-C6                 | 0.6800 | 0.0459 | -0.7043 |

DG, diacylglycerol; FA, fatty acid; AUC, area under curve; FC, fold change.

Table SVII. Characteristics and clinical indicators of the patients in the external cohort.

| Variable               | COPD-NE (n=10) | COPD-FE (n=10) | P-value            |
|------------------------|----------------|----------------|--------------------|
| Age, years             | 70.5 (4.0)     | 70.0 (7.0)     | 0.667 <sup>a</sup> |
| Male                   | 8 (80.0%)      | 6 (60.0%)      | 0.329              |
| BMI, kg/m <sup>2</sup> | 22.1(4.0)      | 23.7 (3.8)     | 0.234 <sup>a</sup> |
| Smoking history        |                |                |                    |
| Never smoked           | 2 (20.0%)      | 3 (30.0%)      | 0.806              |
| Current smoker         | 3 (30.0%)      | 1 (10.0%)      |                    |
| Former smoker          | 5 (50.0%)      | 6 (60.0%)      |                    |
| FEV1/FVC%              | 52.2 (7.2)     | 53.5 (10.4)    | 0.488 <sup>b</sup> |
| FEV1% pred             | 51.0 (19.0)    | 50.8 (9.8)     | 0.881 <sup>a</sup> |
| Medication             |                |                |                    |
| LAMA                   | 6 (60.0%)      | 6 (60.0%)      | 0.666              |
| ICS                    | 3 (30.0%)      | 1 (10.0%)      |                    |
| ICS/LABA               | 1 (10.0%)      | 2 (20.0%)      |                    |
| ICS/LABA + LAMA        | 0 (0.0%)       | 1 (10.0%)      |                    |
| None                   | 0 (0.0%)       | 0 (0.0%)       |                    |

Continuous variables were analyzed using <sup>a</sup>two-tailed unpaired Student's t test under assumptions of normality and variance homogeneity, otherwise <sup>b</sup>Mann-Whitney U test. Categorical variables were tested with Fisher's exact test. Continuous variables are presented as the median (IQR); categorical variables are presented as counts (%). FEV1% pred, predicted value of forced expiratory volume in 1 sec; FVC, forced vital capacity; ICS, inhaled corticosteroid; LABA, long-acting  $\beta$ 2-agonist; LAMA, long-acting muscarinic antagonist; BMI, body mass index; COPD, chronic obstructive pulmonary disease; FE, frequent exacerbation; NE, non-frequent exacerbation; IQR, interquartile range.
